# Supplementary material for: Matching queried single-cell open-chromatin profiles to large pools of single-cell transcriptomes and epigenomes for reference supported analysis
Source: HighWire-hosted journal article supplement (doi:10.1101/gr.277015.122), 2023-01-18
Supplement: Supplemental_Table_S1.xlsx [file Supplemental_Table_S1.xlsx]

## Sheet: Human-expression
Supplemental Table S1: Information about sources of reference single-cell expression and open-chromatin datasets. Information is provided for data-sources for both species human and mouse.
HUMAN SINGLE CELL RNA-SEQ
S. No	GSE ID	Abstract	Title	Link
1	SRP011546	Find the casual relationship between gene expression network and cellular phenotype at single cell resolution. We collected donated human pre-implatation embryos, and the embryonic stem cells derived from them, isolate individual cells, prepared single cell cDNAs, and sequenced them by HiSeq2000. Then we analyzed the expression of known RefSeq genes. Overall design: We get transcriptome of 124 in…	Exogenous rescue of KLHL9 in SF210 cell line	https://trace.ncbi.nlm.nih.gov/Traces/sra/?study=SRP011546
2	SRP014428	We assessed Smart-Seq, a new single-cell RNA-Seq library preparation method, on a variety of mouse and human RNA samples or cells. Overall design: We generated RNA-Seq libraries for dilution series of MAQC reference RNA and mouse brain RNA to assess technical reproducibility, and for a variety of individual cells including putative circulating tumour cells.	A genomewide map of PPARb/d target genes in human macrophages identifies a unique agonist-induced activation state - RNAseq	https://trace.ncbi.nlm.nih.gov/Traces/sra/?study=SRP014428
3	SRP018525	Mammalian preimplantation development is a complex process involving dramatic changes in the transcriptional architecture. Through single-cell RNA-sequencing (RNA-seq), we report here a comprehensive analysis of transcriptome dynamics from oocyte to morula in both human and mouse embryos. Based on single nucleotide variants (SNVs) in blastomere mRNAs and paternal-specific SNPs, we identify novel …	RNA-seq of human fibroblasts during normal aging and during aging with rotenone perturbation	https://trace.ncbi.nlm.nih.gov/Traces/sra/?study=SRP018525
4	SRP018838	RNA-seq transcriptome measurements are typically performed by isolating RNA from large numbers of cells in culture or tissues. While highly informative, such experiments mask the variability in gene expression patterns that exists between individual cells. To gain insight into the dynamics of gene expression on the level of single-cells, we have carried out the transcriptomes of single-cells from…	Common inflammatory pathways between NEC and Crohn's disease	https://trace.ncbi.nlm.nih.gov/Traces/sra/?study=SRP018838
5	SRP028301	Improved Smart-Seq for sensitive full-length transcriptome profiling in single cells. Overall design: Cells of four different origins were profiled using commercial SMARTer and compared to five variants of an improved protocol (Smart-Seq2).	The placental gene PEG10 promotes progression of neuroendocrine prostate cancer	https://trace.ncbi.nlm.nih.gov/Traces/sra/?study=SRP028301
6	SRP030617	We generated single-cell transcriptomes from a large number of single cells using several commercially available platforms, in both microliter and nanoliter volumes, and compared performance between them. We benchmarked each method to conventional RNA-seq of the same sample using bulk total RNA, as well as to multiplexed qPCR, which is the current gold standard for quantitative single-cell gene e…	Argonaute 2 binds directly to tRNA genes and promotes gene repression in cis	https://trace.ncbi.nlm.nih.gov/Traces/sra/?study=SRP030617
7	SRP033135	Single-cell expression profiling by RNA-Seq promises to exploit cell-to-cell variation in gene expression to reveal regulatory circuitry governing cell differentiation and other biological processes. Here, we describe Monocle, a novel unsupervised algorithm for ordering cells by progress through differentiation that dramatically increases temporal resolution of expression measurements. This reord…	Deconstruction of O-glycosylation “ Polypeptide GalNAc-T Isoforms Direct Distinct Subsets of the O-Glycoproteome	https://trace.ncbi.nlm.nih.gov/Traces/sra/?study=SRP033135
8	SRP034543	We reported a new method of single-cell universal poly(A)-independent RNA sequencing (SUPeR-seq) to obtain single cell whole transcriptome analysis that covers both poly(A) plus and poly(A) minus RNA species. We built libraries of single mouse ESC , 10pg, 100pg and 1ng diluted mouse ES total RNA, single HEK293T cell and mouse early embryos before 4-cell stage. We analyzed these data using bioinfo…	Identification and characterization of MCF01A circular RNAs [RNA-seq]	https://trace.ncbi.nlm.nih.gov/Traces/sra/?study=SRP034543
9	SRP042161	We report transcriptomes from 430 single glioblastoma cells isolated from 5 individual tumors and 102 single cells from gliomasphere cells lines generated using SMART-seq. In addition, we report population RNA-seq from the five tumors as well as RNA-seq from cell lines derived from 3 tumors (MGH26, MGH28, MGH31) cultured under serum free (GSC) and differentiated (DGC) conditions. This dataset hig…	Analysis of HeLa cells after transfection with miR-1 or miR-155, by ribosome profiling and mRNA-Seq	https://trace.ncbi.nlm.nih.gov/Traces/sra/?study=SRP042161
10	SRP043417	Massively parallel DNA sequencing of thousands of samples in a single machine-run is now possible, but the preparation of the individual sequencing libraries is expensive and time-consuming. Tagmentation-based library construction, using the Tn5 transposase, is efficient for generating sequencing libraries but currently relies on undisclosed reagents, which severely limits development of novel ap…	ChipSeq of FoxP3 bound regions and mRNAseq data of human Treg and CD4+ Th cells	https://trace.ncbi.nlm.nih.gov/Traces/sra/?study=SRP043417
11	SRP049500	Single-cell genomics and single-cell transcriptomics have recently emerged as powerful tools to study the biology of single cells at a genome-wide scale. Here we describe a method that allows the integration of genomic DNA and mRNA sequencing from the same cell. We use this method to correlate DNA copy number variation to transcriptome variability among individual cells. Overall design: First, ha…	HEK293_RNA-seq	https://trace.ncbi.nlm.nih.gov/Traces/sra/?study=SRP049500
12	SRP050499	Germ cells are vital for transmitting genetic information from one generation to the next and for maintaining the continuation of species. Here, we analyze the transcriptome of human primordial germ cells (PGCs) from the migrating stage to the gonadal stage at single-cell and single-base resolutions. Human PGCs show unique transcription patterns involving the simultaneous expression of both pluri…	Homo sapiens strain:MCF-7 Transcriptome or Gene expression	https://trace.ncbi.nlm.nih.gov/Traces/sra/?study=SRP050499
13	SRP050992	Oscillatory gene expression is fundamental to mammalian development, but technologies to monitor expression oscillations are limited. We have developed a statistical approach called Oscope to identify and characterize the transcriptional dynamics of oscillating genes in single-cell RNA-seq data from an unsynchronized cell population. Applications to a number of data sets, include a single-cell RN…	Multiple platform assessment and isomir analysis of the EGF dependent microRNA-ome by microarray and deep sequencing analysis [small RNA-seq]	https://trace.ncbi.nlm.nih.gov/Traces/sra/?study=SRP050992
14	SRP053004	We sorted 2PN stage human embryos by predicted viability using a noninvasive measurement we previously developed. We then performed RNA-seq on each embryo (which was a single cell) and looked for differences in expression between viable and nonviable embryos. Overall design: We sequenced the transcriptomes of 22 human zygotes (2PN stage) embryos, of which 11 were predicted nonviable and 11 were p…	human_plasma	https://trace.ncbi.nlm.nih.gov/Traces/sra/?study=SRP053004
15	SRP053052	Recently, RNA sequencing has achieved single cell resolution, but what is limiting is an effective way to routinely isolate and process large numbers of individual cells for in-depth sequencing, and to do so quantitatively. We have developed a droplet-microfluidic approach for parallel barcoding thousands of individual cells for subsequent RNA profiling by next-generation sequencing. This high-th…	Redefinition of Human Androgen Responsive Elements [ChIP-Seq, RNA-Seq]	https://trace.ncbi.nlm.nih.gov/Traces/sra/?study=SRP053052
16	SRP055153	We performed single-cell and bulk transcriptome profiling in two different human cell lines. We performed single-cell RNA sequencing in live and fixed cells. Overall design: Single cell RNA sequencing of live and fixed cells, bulk RNA sequencing in two cell lines.	Cellular generation of 5-Hydroxymethylcytosine by redox-active chemicals via an unprecedent non-enzymatic mechanism	https://trace.ncbi.nlm.nih.gov/Traces/sra/?study=SRP055153
17	SRP055569	Single cell transcriptomics has emerged as a powerful approach to dissecting phenotypic heterogeneity in complex, unsynchronized cellular populations. However, many important biological questions demand quantitative analysis of large numbers of individual cells. Hence, new tools are urgently needed for efficient, inexpensive, and parallel manipulation of RNA from individual cells. We report a sim…	Epstein-Barr virus maintains lymphomas via its miRNAs	https://trace.ncbi.nlm.nih.gov/Traces/sra/?study=SRP055569
18	SRP055810	Here we provide fundamental insights into early human development by single-cell RNA-sequencing of human and mouse preimplantation embryos. We elucidate conserved transcriptional programs along with those that are human-specific. Importantly, we validate our RNA-sequencing findings at the protein level, which further reveals differences in human and mouse embryo gene expression. For example, we i…	Genome-wide Analysis of Transcriptional Regulators in Human Blood Stem/Progenitor Cells reveals a densely interconnected network of coding and non-coding genes.	https://trace.ncbi.nlm.nih.gov/Traces/sra/?study=SRP055810
19	SRP057196	We used single cell RNA sequencing on 466 cells to capture the cellular complexity of the adult and fetal human brain at a whole transcriptome level. Healthy adult temporal lobe tissue was obtained from epileptic patients during temporal lobectomy for medically refractory seizures. We were able to classify individual cells into all of the major neuronal, glial, and vascular cell types in the brai…	The sequence of HCC1395 (ATCC CRL-2324) and HCC1395BL (ATCC CRL-2325) human cell lines	https://trace.ncbi.nlm.nih.gov/Traces/sra/?study=SRP057196
20	SRP058046	Mammalian interphase chromosomes interact with the nuclear lamina (NL) through hundreds of large Lamina Associated Domains (LADs). We report a method to map NL contacts genome-wide in single human cells. Analysis of ~400 maps reveals a core architecture of gene-poor LADs that contact the NL with high cell-to-cell consistency, interspersed by LADs with more variable NL interactions. The variable c…	High-efficiency RNA cloning enables quantitative measurement of miRNA expression by deep sequencing	https://trace.ncbi.nlm.nih.gov/Traces/sra/?study=SRP058046
21	SRP058773	Induced pluripotency is a promising avenue for disease modeling and therapy, but the molecular principles underlying this process, particularly in human cells, remain poorly understood due to donor-to-donor variability and intercellular heterogeneity. Here we constructed and characterized a clonal, inducible human reprogramming system that provides a reliable source of cells at any stage of the p…	Global response to chemotherapy-induced apoptosis	https://trace.ncbi.nlm.nih.gov/Traces/sra/?study=SRP058773
22	SRP059035	To address how intratumoral heterogeneity affects anti-cancer drug responses, we profiled transcriptomes of single cancer cells originating from lung adenocarcinoma patient-derived xenograft (PDX) tumors. Overall design: We performed single-cell RNA sequencing (scRNA-Seq) together with bulk sequencing by applying Smart-Seq protocol (Ramsköld et al., Nat Biotechnol 2012). Enrichment of cancer cell…	Deep Sequencing Identifies Multiple Fusion Transcripts, Differentially Expressed Genes, and Generalized Immune Suppression in BRAF (V600E) mutant vs. BRAF wild-type Papillary Thyroid Carcinoma	https://trace.ncbi.nlm.nih.gov/Traces/sra/?study=SRP059035
23	SRP059379	Induced pluripotent stem cell (iPSC)-derived cortical neurons present a powerful new model of neurological disease. Previous work has established that differentiation protocols produce cortical neurons but little has been done to characterise these at cellular resolution. In particular, it is unclear to what extent in vitro two-dimensional, relatively disordered culture conditions recapitulate th…	Large-scale multi-species survey of metabolome and lipidome	https://trace.ncbi.nlm.nih.gov/Traces/sra/?study=SRP059379
24	SRP060416	Single cell RNA-sequencing of human tonsil Innate lymphoid cells (ILCs) from three independent tonsil donors. Overall design: Sequencing libraries were prepared from FACS sorted individual ILCs with the Smart-Seq2 protocol (Picelli et al. Nature Methods 2013)	Promiscuous RNA binding by PRC2	https://trace.ncbi.nlm.nih.gov/Traces/sra/?study=SRP060416
25	SRP062177	The human neocortex is created from diverse progenitors that are intermixed with multiple cell types in the prenatal germinal zones. These progenitors have been difficult to profile with unbiased transcriptomics since progenitors-particularly radial glia (RG)-are rare cell types, defined by a combination of intracellular markers, position and morphology. To circumvent these problems, we developed…	Transcriptomic profiling reveals new aspects of progestin signaling in breast cancer	https://trace.ncbi.nlm.nih.gov/Traces/sra/?study=SRP062177
26	SRP063840	Clear cell renal cell carcinoma (ccRCC) initiated from the renal epithelium is the most prevalent histological type of adult kidney cancers. Dissecting intratumoral heterogeneity (ITH) of ccRCC has leveraged to extend our knowledge on how primary tumors harboring driver mutations evolve and spread to other sites. The cellular fractions within and across the primary (pRCC) and metastatic RCC (mRCC…	Transcriptome analysis reveals differential splicing events in IPF lung tissue	https://trace.ncbi.nlm.nih.gov/Traces/sra/?study=SRP063840
27	SRP064464	We report the single-cell RNA-seq based identification of 6 known human islet cell types (alpha cells, beta cells, delta cells, pp cells, acinar cells and duct cells) based on the expression of known marker genes. We further assess cell type specific gene expression and suggest novel marker genes for several cell types. Overall design: Transcriptional dissection of human pancreatic islets of one …	The splicing activator DAZAP1 integrates splicing control into MEK/Erk regulated cell proliferation and migration	https://trace.ncbi.nlm.nih.gov/Traces/sra/?study=SRP064464
28	SRP066834	Cerebral organoids – three-dimensional cultures of human cerebral tissue derived from pluripotent stem cells – have emerged as models of human cortical development. However, the extent to which in vitro organoid systems recapitulate neural progenitor cell proliferation and neuronal differentiation programs observed in vivo remains unclear. Here we use single-cell RNA sequencing (scRNA-seq) to dis…	Comprehensive Analysis of Gene Expression in Human Retina and Supporting Tissues	https://trace.ncbi.nlm.nih.gov/Traces/sra/?study=SRP066834
29	Zheng et. al.		Massively parallel digital transcriptional profiling of single cells	https://www.10xgenomics.com/datasets/
30	GSE102066	Human pluripotent stem cells (hPSC) offer a unique cellular model to study the molecular details underpinning embryonic development. We profiled single-cell RNA-seq (scRNA-seq) on 957 single cells collected at 6 time points over a 30-day period of non-directed differentiation of human neural progenitor cells (NPC) generated from hESC. Computational and experimental analyses of this comprehensive …	Time course profiling of scRNA-seq of non-directed differentiation of human Neural precursor cells (NPCs) generated from hESC	https://www.ncbi.nlm.nih.gov/geo/query/acc.cgi?acc=GSE102066
31	GSE106540	CD4+ cytotoxic T lymphocytes (CD4-CTLs) have been reported to play a protective role in several viral infections. However, little is known in humans about the biology of CD4-CTL generation, their functional properties, heterogeneity and clonal diversity, especially in relation to other well-described CD4+ memory T cell subsets. We performed single-cell RNA-seq in over 9000 cells to unravel CD4-CT…	Precursors of human CD4+ cytotoxic T lymphocytes identified by single-cell transcriptome analysis [scRNA-seq]	https://www.ncbi.nlm.nih.gov/geo/query/acc.cgi?acc=GSE106540
32	GSE109449	Transcriptomics of distinct subpopulations of synovial fibroblasts from osteoarthritis and rheumatoid arthritis arthroplasty tissues.	Single cell RNA-seq analysis of freshly isolated synovial fibroblasts in patients with rheumatoid arthritis or osteoarthritis	https://www.ncbi.nlm.nih.gov/geo/query/acc.cgi?acc=GSE109449
33	GSE84070	Adult cardiac progenitor/stem cells (CPC/CSC) are multipotent resident populations involved in cardiac homeostasis and heart repair. Assisted by complementary RNAseq analysis, we defined the proteome fraction associable to specific CPC functions by comparison with human mesenchymal stem cells (MSC), the reference population for cell therapy. Label-free proteomics analysis identified 526 proteins …	Definition of human cardiac progenitor cell plasma membrane signature: comparative genomic and proteomics analysis with human mesenchymal stem cells	https://www.ncbi.nlm.nih.gov/geo/query/acc.cgi?acc=GSE84070
34	GSE84465	We used single-cell RNAseq to investigate the heterogeneity of glioblastoma tumors and assess differential expression between cells within and in proximity of the tumor.	Single-Cell RNAseq analysis of diffuse neoplastic infiltrating cells at the migrating front of human glioblastoma	https://www.ncbi.nlm.nih.gov/geo/query/acc.cgi?acc=GSE84465
35	GSE84789	Background: Immune checkpoint blockade improves survival in a subset of patients with non-small cell lung cancer (NSCLC), but robust biomarkers that predict response to PD-1 pathway inhibitors are lacking. Furthermore, our understanding of the diversity of the NSCLC tumor immune microenvironment remains limited. Methods: We performed comprehensive flow-cytometric immunoprofiling on both tumor and…	Single-cell profiling of non small cell lung cancer associated B-cells.	https://www.ncbi.nlm.nih.gov/geo/query/acc.cgi?acc=GSE84789
36	GSE95155	Technical variance is a major confounding factor in single-cell RNA sequencing, not least because measurements on the same cell are not replicable. We developed BEARscc, a tool that simulates experiment-specific technical replicates based on a probabilistic model of technical variance trained on RNA spike-in measurements. We demonstrate that the tool improves the unsupervised classification of ce…	BEARscc: robustness of single-cell clusters determined using simulated technical replicates	https://www.ncbi.nlm.nih.gov/geo/query/acc.cgi?acc=GSE95155
37	GSE99305	APE1 was knocked down using siRNA in low passage patient-derived PDAC cells and the resulting cells, along with control cells were analysed using scRNA-seq to identify differentially expressed genes and pathways as a result of APE1 knock-down.	Single-cell RNA-seq following APE1/Ref-1 knockdown in Pancreatic Ductal Adenocarcinoma	https://www.ncbi.nlm.nih.gov/geo/query/acc.cgi?acc=GSE99305
38	GSE81861	Intratumoralmheterogeneity is a major obstacle to cancer treatment and a significant confounding factor in bulk-tumor profiling. We performed an unbiased analysis of transcriptional heterogeneity in colorectal tumors and their microenvironments using single-cell RNA–seq from 11 primary colorectal tumors and matched normal mucosa. To robustly cluster single-cell transcriptomes, we developed refere…	Reference component analysis of single-cell transcriptomes elucidates cellular heterogeneity in human colorectal tumors	https://www.ncbi.nlm.nih.gov/geo/query/acc.cgi?acc=GSE81861
39	SRA617020	We report changes in B cells in patients treated with combination immune checkpoint blockade (CCB; anti-CTLA4 and anti-PD1)	Early Changes In B Cell Subsets Predict Risk Of Autoimmunity Following Combination Immune Checkpoint Blockade	https://www.ncbi.nlm.nih.gov/geo/query/acc.cgi?acc=GSE104600
40	SRA621638	We report an alteration in subset composition and function of ILCs in monoclonal gammapthy.	Changes in Bone Marrow Innate Lymphoid Cell Subsets In Monoclonal Gammopathy: Target For IMiD Therapy	https://www.ncbi.nlm.nih.gov/geo/query/acc.cgi?acc=GSE105216
41	SRA628554	CD4+ cytotoxic T lymphocytes (CD4-CTLs) have been reported to play a protective role in several viral infections. However, little is known in humans about the biology of CD4-CTL generation, their functional properties, heterogeneity and clonal diversity, especially in relation to other well-described CD4+ memory T cell subsets. We performed single-cell RNA-seq in over 9000 cells to unravel CD4-CT…	Precursors of human CD4+ cytotoxic T lymphocytes identified by single-cell transcriptome analysis [10X genomics]	https://www.ncbi.nlm.nih.gov/geo/query/acc.cgi?acc=GSE106543
42	SRA634975	multi-omics and single cell studies of clonally-derived ovarian cancer cell lines with acquired resistance to carboplatin.	multi-omics and single cell studies of clonally-derived ovarian cancer cell lines with acquired resistance to carboplatin.	https://trace.ncbi.nlm.nih.gov/Traces/sra/?study=SRP125899
43	SRA635094	Human pluripotent stem cells (hPSCs) provide both powerful models for studying cellular differentiations, and unlimited sources of cells for regenerative medicine. However, a comprehensive single cell level differentiation roadmap for hPSCs has not been achieved yet. Here, we used high throughput single-cell RNA-sequencing (scRNA-seq) method, based on optimized microfluidic circuits, to profile e…	Mapping human pluripotent stem cell differentiation pathways via high throughput single-cell RNA-sequencing	https://www.ncbi.nlm.nih.gov/geo/query/acc.cgi?acc=GSE107552
44	SRA636225	The purpose of this experiment is to detect and characterize circulating tumor cells in single cell sequence data and characterize the other cell types in the blood.	Single-cell RNA sequencing of circulating tumor cells in hepatocellular carcinoma	https://www.ncbi.nlm.nih.gov/geo/query/acc.cgi?acc=GSE107747
45	SRA640325	Two single-cell transcriptional analyses were performed on adult human lung distal and proximal stromal cells, respectively. We isolated lung specimen from both the proximal portion enriched in airways and distal portion enriched in alveoli separately. The lung fragments were then dissociated to single cells and FACSorted for stromal cells based on negative expression of epithelial, hematopoietic…	Hedgehog gradient in the stroma maintains niche diversity and organ function	https://www.ncbi.nlm.nih.gov/geo/query/acc.cgi?acc=GSE108288
46	SRA640903	The goal of this study is to apply the SAKE algorithms to identify drug-resistant cellular populations as human melanoma cells respond to targeted BRAF inhibitors. Single-cell RNA-Seq data from 10x Genomics platform was analyzed to dissect this problem at multiple scales. Data indicates that BRAF inhibitor resistant cells can emerge from rare populations already present before drug application, w…	SAKE (Single-cell RNA-Seq Analysis and Klustering Evaluation) Identifies Markers of Resistance to Targeted BRAF Inhibitors in Melanoma Cell Populations	https://www.ncbi.nlm.nih.gov/geo/query/acc.cgi?acc=GSE108394
47	SRA645804	To reveal distinct transcriptomes associated with various spermatogenic cells, including spermatogonial stem cells and all of their subsequent progeny, single-cell transcriptomes from Adult human spermatogonia, StaPut-enriched spermatocytes and spermatids, or unselected steady-state spermatogenic cells were used for Drop-Seq analysis. We used the 10x Genomics Chromium (Drop-Seq) to perform single…	10x Genomics Drop-seq single-cell RNA-seq of isolated Adult human spermatogonia, spermatocytes, spermatids & steady-state spermatogenic cells	https://www.ncbi.nlm.nih.gov/geo/query/acc.cgi?acc=GSE109037
48	SRA646572	Single cell RNA-seq of human 10 week embryo forebrain tissue,Human Forebrain tissue of a Week 10 embryo was stored overnight in Hibernate-A Thermo-Fisher in order to study RNA stability	Single cell RNA-seq of human 10 week embryo forebrain tissue,Human Forebrain tissue of a Week 10 embryo was stored overnight in Hibernate-A Thermo-Fisher in order to study RNA stability	https://trace.ncbi.nlm.nih.gov/Traces/sra/?study=SRP129388
49	SRA650215	In order to shed light on human kidney development we have used single-cell transcriptomics to characterize gene expression in different cell population and to study individual cell dynamics and lineage trajectories during development.	Single-cell analysis of progenitor cell dynamics and lineage specification of the human fetal kidney	https://www.ncbi.nlm.nih.gov/geo/query/acc.cgi?acc=GSE109205
50	SRA652805	Organoids derived from human pluripotent stem cells are a potentially powerful tool for high-throughput screening (HTS) but the complexity of organoid cultures poses a significant challenge for miniaturization and automation. In this study single-cell RNA sequencing identify within organoids previously-undetected parietal and interstitial compartments. We discovered that addition of vascular endo…	Enhancing human kidney organoid differentiation from pluripotent stem cells with high-throughput automation	https://www.ncbi.nlm.nih.gov/geo/query/acc.cgi?acc=GSE109718
51	SRA658915	To understand tumor stromal cell heterogeneity focusing on tumor endothelial cells and tumor-associated fibroblasts we isolated single cells from COLO205 tumor xenograft grown sub-cutaneously in SCID mice. To enrich stromal cell content we removed vast majority of tumor cells by a depletion protocol using anti-CD24 and anti-E-Cadherin antibodies. The remaining single cells were profiled by single…	Single-cell transcriptome analyses reveal endothelial cell heterogeneity in tumors and changes following anti-angiogenic treatment	https://www.ncbi.nlm.nih.gov/geo/query/acc.cgi?acc=GSE110501
52	SRA660949	Ex-vivo culture conditions used to expand the numbers of hematopoietic stem cells (HSCs) present within an umbilical cord blood (UCB) unit create cellular stresses leading to loss or at best maintenance of the primitive HSCs. Recently we have shown that treatment with a histone deacetylase inhibitor valproic acid (VPA) increases substantially the numbers of transplantable HSCs from UCB-CD34+ cell…	Ex-vivo Human Hematopoietic Stem Cell Expansion Requires Coordination of Cellular Reprogramming with Mitochondrial Remodeling and P53 Activation	https://www.ncbi.nlm.nih.gov/geo/query/acc.cgi?acc=GSE110973
53	SRA661790	The balance between tolerogenic and inflammatory responses determines immune homeostasis in the gut. Dysbiosis and a defective host defense against invading intestinal bacteria can shift this balance via bacterial-derived metabolites and trigger chronic inflammation. We show that the short chain fatty acid butyrate modulates monocyte to macrophage differentiation by promoting antimicrobial effect…	The commensal-derived metabolite butyrate imprints an antimicrobial program in macrophages	https://www.ncbi.nlm.nih.gov/geo/query/acc.cgi?acc=GSE111049
54	SRA665712	Single-cell RNA-seq of a primary CD4 T cell model of human HIV latency.	single-cell RNA sequencing of primary model of HIV latency	https://trace.ncbi.nlm.nih.gov/Traces/sra/?study=SRP134859
55	SRA667709	Human adult spermatogenesis involves a balance of spermatogonial stem cell self renewal and differentiation alongside complex germline-niche interactions. To better understand we performed single cell RNA sequencing of ~7000 testis cells from three healthy men of peak reproductive age. Our analyses revealed multiple distinctive transcriptional states of self-renewing and differentiating spermatog…	The Human Testis Cell Atlas via Single-cell RNA-seq (Healthy men scRNA-seq data set)	https://www.ncbi.nlm.nih.gov//geo/query/acc.cgi?acc=GSE112013
56	SRA676027	Human cancers arising from different cell lineages display genotypes with characteristic features but the lineage-specific factors that influence the differences in genetic profiles have not been identified. Such differences could be explained by models in which a cellular phenotype limits a cells vulnerability to certain mutations or by models in which observed mutations determine the ultimate c…	Generation of pulmonary neuro-endocrine cells and tumors resembling small cell lung cancers from human embryonic stem cells	https://trace.ncbi.nlm.nih.gov/Traces/sra/?study=SRP136659
57	SRA678017	To characterize the cellular diversity in the human kidney cortical nephrogenic niche we dissociated cells from the cortex and performed 10X Genomics single-cell RNA sequencing.	Single Cell RNA-Seq profiling human embryonic kidney cortex cells	https://www.ncbi.nlm.nih.gov/geo/query/acc.cgi?acc=GSE112570
58	SRA688526	We describe the different cell types and their differential gene expression patterns present in six-month-old cortical organoids following single cell analysis.	Spontaneous functional network activity in organoids resembles programmed early human brain development	https://www.ncbi.nlm.nih.gov/geo/query/acc.cgi?acc=GSE113089
59	SRA691388	Breast cancer arises from breast epithelial cells that acquire genetic alterations leading to subsequent loss of tissue homeostasis. Several distinct epithelial subpopulations have been proposed but complete understanding of the spectrum of heterogeneity and differentiation hierarchy in the human breast remains elusive. Here we used single-cell mRNA sequencing (scRNAseq) to profile the transcript…	Single Cell RNA sequencing of Adult Human Breast Epithelial Cells [Individual 4..7]	https://www.ncbi.nlm.nih.gov//geo/query/acc.cgi?acc=GSE113196
60	SRA700673	Ectopic expression of defined transcription factors can force direct cell fate conversion from one lineage to another in the absence of cell division. Several transcription factor cocktails have enabled successful reprogramming of various somatic cell types into induced neurons (iNs) of distinct neurotransmitter phenotype. However the nature of the intermediate states that drive the reprogramming…	Pericyte-to-neuron reprogramming via unfolding of a neural stem cell-like program	https://www.ncbi.nlm.nih.gov//geo/query/acc.cgi?acc=GSE113036
61	SRA701877	We report the pseudotime ordering of single non-diabetic human beta-cells detected by large-scale RNA sequencing. We identified major states with 1) low UPR and low insulin gene expression 2) low UPR and high insulin gene expression or 3) high UPR and low insulin gene expression. The latter state was enriched for proliferating cells. Stressed human beta-cells do not dedifferentiate and show littl…	Pseudotime Ordering of Single Human Beta-Cells Reveals States of Insulin Production and Unfolded Protein Response	https://www.ncbi.nlm.nih.gov/geo/query/acc.cgi?acc=GSE114297
62	SRA703206	single cell RNA-Seq of colonic mesenchyme cell populations in health and Ulcerative Colitis in human patients and health in DSS-induced colitis in murine colon.	Composition of the Colonic Mesenchyme and the Nature of its Plasticity in Inflammatory Bowel Disease	https://www.ncbi.nlm.nih.gov/geo/query/acc.cgi?acc=GSE114374
63	SRA704181	10X Genomics single cell RNAseq of MCF7 cells Human cancer cell lines are the workhorse of cancer research. While cell lines are known to evolve in culture the extent of the resultant genetic and transcriptional heterogeneity and its functional consequences remain understudied. Here genomic analyses of 106 cell lines grown in two laboratories revealed extensive clonal diversity. Follow-up compreh…	Genetic and transcriptional variation alters cancer cell line drug response [MCF7]	https://www.ncbi.nlm.nih.gov//geo/query/acc.cgi?acc=GSE114459
64	SRA705190	scRNA-seq data human fetal kidneys at 5 different ages.	Single cell RNA-sequencing of human fetal kidneys 10X-based	https://www.ncbi.nlm.nih.gov//geo/query/acc.cgi?acc=GSE114530
65	SRA709816	These files represent single cell RNA-Seq data generated on a 10x Chromium genomics platform from four biological replicates of iPSC-derived human kidney organoids in two batches differentiated according to our published protocol (Takasato et al. Nature Protocols 2016). The aggregated human organoid data contains populations representing endothelial cells podocytes stroma nephron and off-target p…	Single cell RNA-Seq of four human kidney organoids	https://www.ncbi.nlm.nih.gov//geo/query/acc.cgi?acc=GSE114802
66	SRA710104	Adipose-derived mesenchymal stem cells (ADSCs) show considerable promise for clinical applications in regenerative medicine. However our understanding of the intrapopulation heterogeneity and the pattern of lineage priming of cultured ADSCs has been impeded by technical challenges. The lack of a thorough understanding of the cellular heterogeneity of ADSCs has hampered the development of an effic…	single-cell transcriptomic sequencing of 24370 adipose-derived mesenchymal stem cells	https://trace.ncbi.nlm.nih.gov/Traces/sra/?study=SRP148833
67	SRA711898	We performed single-cell RNA-seq on dendritic cells isolated from the tonsils of one healthy donor. We used the 10x chromium technology.The expression matrix provided in supplementary is the result of Cellranger aggregate method on : GSE115007 GSE115006 and GSE103544.	Single-cell RNA-seq analysis of human tonsil dendritic cells	https://www.ncbi.nlm.nih.gov/geo/query/acc.cgi?acc=GSE115006
68	SRA713577	Healthy human peripheral blood mononuclear cells (PBMCs) investigated with 10x Genomics single cell RNA-sequencing.	Single cell profiling of peripheral blood mononuclear cells from healthy human donor	https://www.ncbi.nlm.nih.gov/geo/query/acc.cgi?acc=GSE115189
69	SRA716153	For both PBMC and cells from the in vitro cultures RNA purification and library generation was performed using the Chromium Single Cell Controller apparatus and associated protocols (10X Genomics). Libraries were sequenced by 75-bp single-end reading on a NextSeq500 sequencer (Illumina). Reads were aligned on the GRCh38 human genome assembly.	Analysis of single-cell RNA-seq data from human PBMCs and from in vitro cultures of human cord blood CD34+ progenitors encompassing different DC types	https://www.ncbi.nlm.nih.gov/geo/query/acc.cgi?acc=GSE115405
70	SRA716608	The liver is the largest solid organ in the body and is critical for metabolic and immune functions. However surprisingly little is known about the cells that make up the human liver and its immune microenvironment. To address this we mapped the cellular landscape in the human liver using single cell RNA sequencing. We carefully fractionated fragile fresh hepatic tissue from human livers to obtai…	Dissecting the human liver cellular landscape by single cell RNA-seq reveals novel intrahepatic monocyte/ macrophage populations	https://www.ncbi.nlm.nih.gov/geo/query/acc.cgi?acc=GSE115469
71	SRA721637	Most adult B cell lymphomas originate from germinal center (GC) B cells but it is unclear to what extent overt lymphoma B cells retain GC B cell functional dynamics or are blocked in a particular stage of the GC reaction. Here we used integrative single-cell analysis of phenotype gene expression and IGH sequence to track the characteristic human GC B cell program in follicular lymphoma (FL) B cel…	Integrative single-cell analysis reveals human germinal center dynamics de-synchronized in B cell lymphoma	https://www.ncbi.nlm.nih.gov//geo/query/acc.cgi?acc=GSE115795
72	SRA728025	We report the results of 3 single cell RNA-sequencing (10x chromium) experiments looking to characterise the composition of the intestinal epithelial cells in health and Ulcerative Colitis in order to identify drivers of intestinal inflammation at the molecular level. The data in this submission comprises of 3 repeat experiments (A B C) with biopsy samples taken from colonic biopsies collected fr…	Colonic single epithelial cell census reveals goblet cell drivers of barrier breakdown in inflammatory bowel disease	https://www.ncbi.nlm.nih.gov//geo/query/acc.cgi?acc=GSE116222
73	SRA729910	Mechanically dissociated IPF lung explant derived cellular suspensions were cultured in 50% senescent lung fibroblast conditioned medium + 50% fibroblast complete medium (DMEM + 15% FBS + antiboitics) and 10M of Y27632. After approximately 2 weeks cells were passaged and cultured overnight in Pneumacult Ex Plus medium (STEMCELL technologies).	Single cell RNA sequencing of cultured CCR10+ and CCR10- lung airway epithelial cells	https://www.ncbi.nlm.nih.gov//geo/query/acc.cgi?acc=GSE115982
74	SRA732346	We performed large-scale single-cell RNA-seq on human iPSCs subjected to endothelial cell differentiation.	Human iPSC-EC differentiation	https://www.ncbi.nlm.nih.gov//geo/query/acc.cgi?acc=GSE116555
75	SRA740174	Neutrophils are short-lived immune cells that play important roles in a variety of diseases. The oligopotent Granulocyte Monocyte Progenitors (GMP) in the bone marrow give rise to monocytes and all granulocytes. Although several monocyte progenitors have been identified in mouse bone marrow the unipotent neutrophil progenitors are still not well-defined. Here we use Cytometry by Time-of-Flight (C…	Discovery of a Pro-Tumoral Clonogenic Unipotent Neutrophil Progenitor in Mouse and Human Bone Marrow	https://www.ncbi.nlm.nih.gov//geo/query/acc.cgi?acc=GSE117131
76	SRA742961	Single-cell RNA-sequencing was conducted on specific cell types and heterogeneous viable cells (sorted by FACS) in order to determine a cellular atlas of the normal human prostate.	Single Cell RNA-sequencing of cell types isolated by FACS from normal human prostates	https://www.ncbi.nlm.nih.gov//geo/query/acc.cgi?acc=GSE117403
77	SRA749327	Serial blood draws from a single patient and serial tumor biopsies from the same patient with metastatic Merkel cell polyomavirus Merkel cell carcinoma who was treated with cellular immunotherapy targeting MCPyV (autologous endogenous T cell therapy) followed by checkpoint inhibitors (anti-PD1 and anti-CTLA4). The patient had a 22 month clinical response followed by late/acquired resistance. We p…	scRNAseq reveals mechanisms of Merkel cell carcinoma acquired immunotherapy resistance	https://www.ncbi.nlm.nih.gov/geo/query/acc.cgi?acc=GSE117988
78	SRA760933	Single Cell Gene Expression was performed to comprehensively characterize cell subpopulations within human hepatocyte-derived liver progenitor-like cells (HepLPCs).	A single-cell RNA-Seq of human hepatocyte-derived liver progenitor-like cells	https://www.ncbi.nlm.nih.gov/geo/query/acc.cgi?acc=GSE116113
79	SRA763890	To compare diversity of primary human CD8+ T cells that have divided 0 1 or 2 times on day 3 of ex vivo expansion from naive resting state. Methods: Naive T cells were enriched from human peripheral blood monoluclear cells (PBMCs) labeled with CFSE dye and expanded for 3 days using rapid expansion protocol (Li Y. & Kurlander R.J. Journal of Translational Medicine 2010). On day 3 10000 single live…	Gene exression in single T cells across division states.	https://trace.ddbj.nig.ac.jp/DRASearch/study?acc=SRP159013
80	SRA767234	Tonsil phagocytes were prepared by centrifugation on a Ficoll gradient. Dendritic cells and macrophages were enriched by negative selection using magnetic beads. Cell populations were further isolated by cell sorting. Cellular suspensions (3500 cells) were loaded on a 10X Chromium instrument (10X Genomics) according to manufacturers protocol.	Single-cell RNA-seq analysis of human tonsil CD14+ cells	https://www.ncbi.nlm.nih.gov//geo/query/acc.cgi?acc=GSE119506
81	SRA767245	We performed single-cell RNA-seq on CD4 T cells isolated from the tonsils of one healthy donor. We used the 10x chromium technology.	Single-cell RNA-seq analysis of human tonsil CD4 T cells	https://www.ncbi.nlm.nih.gov/geo/query/acc.cgi?acc=GSE119507
82	SRA768499	Natural Killer (NK) cells are innate lymphoid cells (ILCs) involved in antimicrobial and antitumoral responses. Several NK cell subsets have been reported in humans and mice but their heterogeneity across organs and species remains poorly characterized. We assessed the diversity of human and mouse NK cells by single-cell RNA sequencing on thousands of individual cells isolated from spleen and blo…	Definition of Natural Killer cell heterogeneity in humans and mice by high-throughput single-cell RNA sequencing	https://www.ncbi.nlm.nih.gov/geo/query/acc.cgi?acc=GSE119562
83	SRA769148	We performed single-cell (sc)RNA-Seq on male donors FACS-sorted primitive (CD34+ CD133+ CD90+) and progenitor (CD34+ CD133+ CD90-) HSPC cells treated with IL2RG ZFN High Specificity (HS) (Low Specificity (LS) or control RNP in a ratio 1 to 1. We also included HS RNP and the cognate repair template containing a GFP expression cassette delivered by AAV6 and sorted for targeted integration (HS/AAV…	Precise Gene Editing Preserves Hematopoietic Stem Cell Function Following Transient p53-Mediate DNA Damage Response	https://www.ncbi.nlm.nih.gov/geo/query/acc.cgi?acc=GSE119594
84	SRA769176	We carry out single cell RNA-sequencing of CD4+CD25+ human T cells.	single cell RNA-sequencing data from CD4+CD25+ human cells	https://www.ncbi.nlm.nih.gov//geo/query/acc.cgi?acc=GSE119373
85	SRA779509	Mass Cytometry and Flow Cytometry [scRNA] New techniques for single-cell analysis have led to insights into hematopoiesis and the immune system but the ability of these techniques to cross-validate and reproducibly identify the biological variation in diverse human samples is currently unproven. We therefore performed a comprehensive assessment of human bone marrow cells using both single-cell RN…	Human Bone Marrow Assessment by Single Cell RNA Sequencing	https://www.ncbi.nlm.nih.gov//geo/query/acc.cgi?acc=GSE120221
86	GEO: GSE156793	The gene expression program underlying the specification of human cell types is of fundamental interest. We generated human cell atlases of gene expression and chromatin accessibility in fetal tissues. For gene expression, we applied three-level combinatorial indexing to >110 samples representing 15 organs, ultimately profiling ~4 million single cells. We leveraged the literature and other atlase…	A human cell atlas of fetal gene expression	https://www.ncbi.nlm.nih.gov/geo/query/acc.cgi?acc=GSE156793

## Sheet: Human-epigenome
Supplemental Table S1: Information about sources of reference single-cell expression and open-chromatin datasets. Information is provided for data-sources for both species human and mouse.
HUMAN SINGLE CELL ATAC-SEQ
S. No	GSE ID	Title	Abstract	Link
1	GSE109828	Cicero Predicts cis-Regulatory DNA Interactions from Single-Cell Chromatin Accessibility Data	Linking regulatory DNA elements to their target genes, which may be located hundreds of kilobases away, remains challenging. Here, we introduce Cicero, an algorithm that identifies co-accessible pairs of DNA elements using single-cell chromatin accessibility data and so connects regulatory elements to their putative target genes. We apply Cicero to investigate how dynamically accessible elements …	https://www.ncbi.nlm.nih.gov/geo/query/acc.cgi?acc=GSE109828
2	GSE117089	Joint profiling of chromatin accessibility and gene expression in thousands of single cells	Here we describe sci-CAR, a combinatorial indexing strategy to jointly profile chromatin accessibility and mRNA in each of thousands of single cells. As a proof-of-concept, we apply sci-CAR to 4,825 cells comprising a time-series of dexamethasone treatment, as well as to 11,233 cells from the mouse kidney.	https://www.ncbi.nlm.nih.gov/geo/query/acc.cgi?acc=GSE117089
3	GSE65360	Single-cell chromatin accessibility data using scATAC-seq	Cell-to-cell variation is a universal feature of life that impacts a wide range of biological phenomena, from developmental plasticity to tumor heterogeneity. While recent advances have improved our ability to document cellular phenotypic variation the fundamental mechanisms that generate variability from identical DNA sequences remain elusive. Here we reveal the landscape and principles of cellu…	https://www.ncbi.nlm.nih.gov/geo/query/acc.cgi?acc=GSE65360
4	GSE68103	Multiplex Single Cell Profiling of Chromatin Accessibility by Combinatorial Cellular Indexing	Technical advances have enabled the collection of genome and transcriptome data sets with single-cell resolution. However, single-cell characterization of the epigenome has remained challenging. Furthermore, because cells must be physically separated prior to biochemical processing, conventional single-cell preparatory methods scale linearly. We applied combinatorial cellular indexing to measure …	https://www.ncbi.nlm.nih.gov/geo/query/acc.cgi?acc=GSE68103
5	GSE107817	Transcript-indexed ATAC-seq reveals paired single-cell T cell receptor identity and chromatin accessibility for precision immune profiling	Genome binding/occupancy profiling by high throughput sequencing	https://www.ncbi.nlm.nih.gov/geo/query/acc.cgi?acc=GSE107817
6	GSE149683	A human cell atlas of fetal chromatin accessibility	The chromatin landscape underlying the specification of human cell types is of fundamental interest. We generated human cell atlases of chromatin accessibility and gene expression in fetal tissues. For chromatin accessibility, we devised a three-level combinatorial indexing assay and applied it to 53 samples representing 15 organs, profiling ~800,000 single cells. We leveraged cell types defined …	https://www.ncbi.nlm.nih.gov/geo/query/acc.cgi?acc=GSE149683

## Sheet: Mouse expression
Supplemental Table S1: Information about sources of reference single-cell expression and open-chromatin datasets. Information is provided for data-sources for both species human and mouse.
MOUSE SINGLE CELL RNA-SEQ
S. No	GSE ID	Title	Abstract	Link
1	GSE81682	The transcriptional landscape of mouse blood stem/progenitor cell transitions at single cell resolution	Current gene-expression databases for the haematopoietic system provide information on gene expression profiles present in bulk populations. Although informative, these studies lack the resolution that can be gained at a single-cell level. In particular, population-average data assumes homogeneity within the population and may as such obscure the ability to detect the heterogeneity of decision-ma…	https://www.ncbi.nlm.nih.gov/geo/query/acc.cgi?acc=GSE81682
2	GSE119945	The dynamic transcriptional landscape of mammalian organogenesis at single cell resolution	During mammalian organogenesis, the cells of the three germ layers transform into an embryo that includes most major internal and external organs. The key regulators of developmental defects can be studied during this crucial period, but conventional approaches lack the throughput and resolution to obtain a global view of the molecular states and trajectories of a rapidly diversifying and expandi…	https://www.ncbi.nlm.nih.gov/geo/query/acc.cgi?acc=GSE119945

## Sheet: Mouse-epigenome
Supplemental Table S1: Information about sources of reference single-cell expression and open-chromatin datasets. Information is provided for data-sources for both species human and mouse.
MOUSE SINGLE CELL ATAC-SEQ
S. No	GSE ID	Title	Abstract	Link
1	GSE111586	A Single-Cell Atlas of In Vivo Mammalian Chromatin Accessibility	We applied a combinatorial indexing assay, sci-ATAC-seq, to profile genome-wide chromatin accessibility in ~100,000 single cells from 13 adult mouse tissues. We identify 85 distinct patterns of chromatin accessibility, most of which can be assigned to cell types, and ~400,000 differentially accessible elements. We use these data to link regulatory elements to their target genes, to define the tra…	https://www.ncbi.nlm.nih.gov/geo/query/acc.cgi?acc=GSE111586
