# Supplementary figures and images for: Matching queried single-cell open-chromatin profiles to large pools of single-cell transcriptomes and epigenomes for reference supported analysis
Source: HighWire-hosted journal article supplement (doi:10.1101/gr.277015.122), 2023-01-18

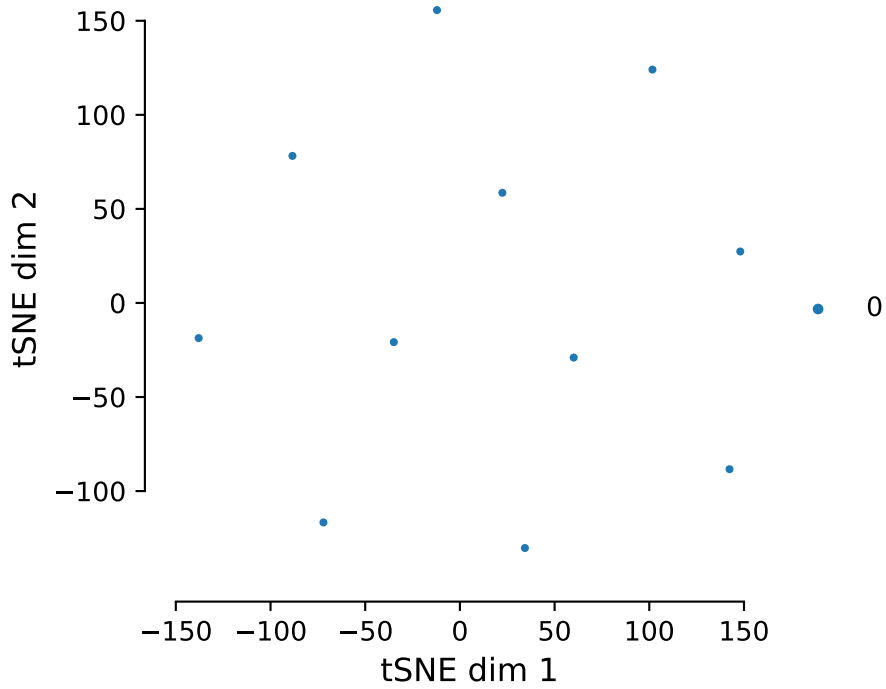

Supplement: Supplemental_Code_and_Data_2.zip [file tsne.pdf › co-embedding-scATAC-seq-queries/EMBEDDING_1_CODE/output_bcell_mouse_SCALE/tsne.pdf]

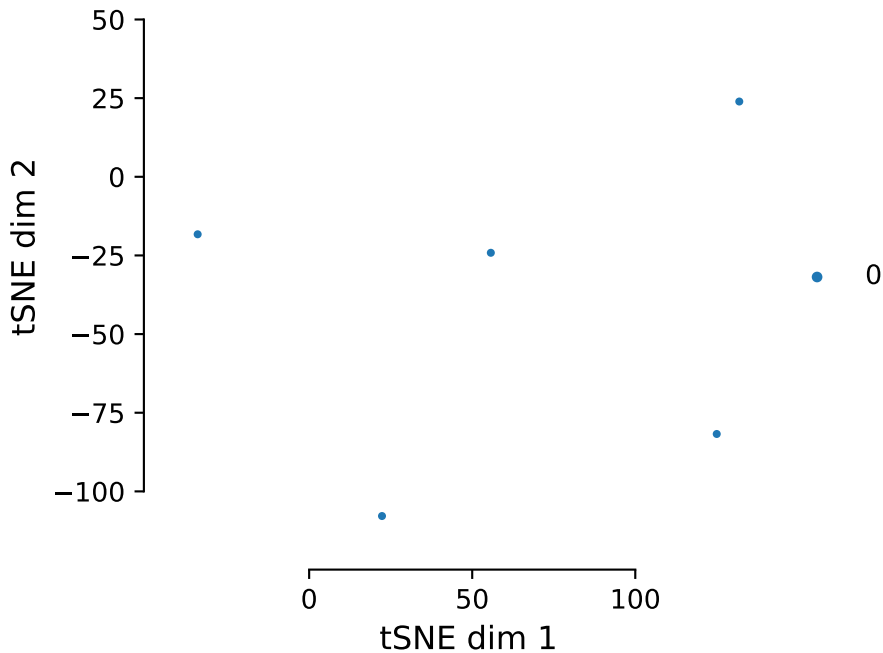

Supplement: Supplemental_Code_and_Data_2.zip [file tsne.pdf › co-embedding-scATAC-seq-queries/EMBEDDING_1_CODE/output_human_GM_GSE68103_SCALE/tsne.pdf]

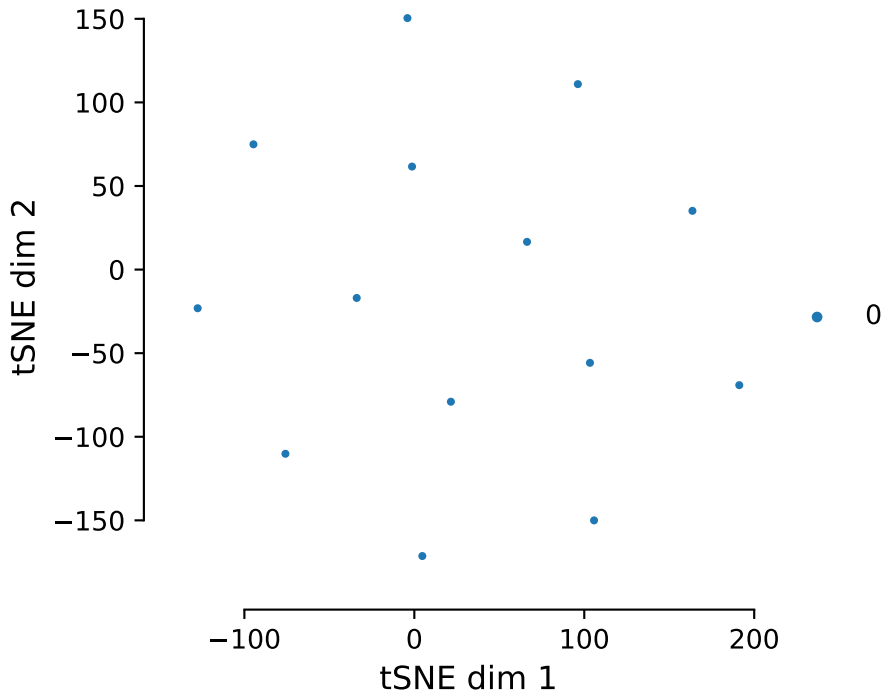

Supplement: Supplemental_Code_and_Data_2.zip [file tsne.pdf › co-embedding-scATAC-seq-queries/EMBEDDING_1_CODE/output_human_GM_SCALE/tsne.pdf]

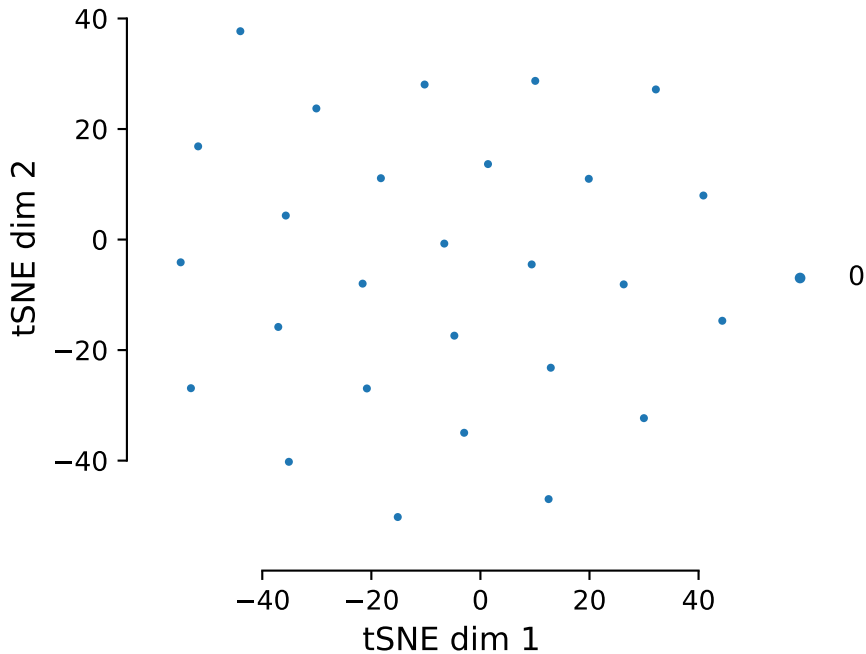

Supplement: Supplemental_Code_and_Data_2.zip [file tsne.pdf › co-embedding-scATAC-seq-queries/EMBEDDING_1_CODE/output_human_hsc_SCALE/tsne.pdf]

tSNE dim 2

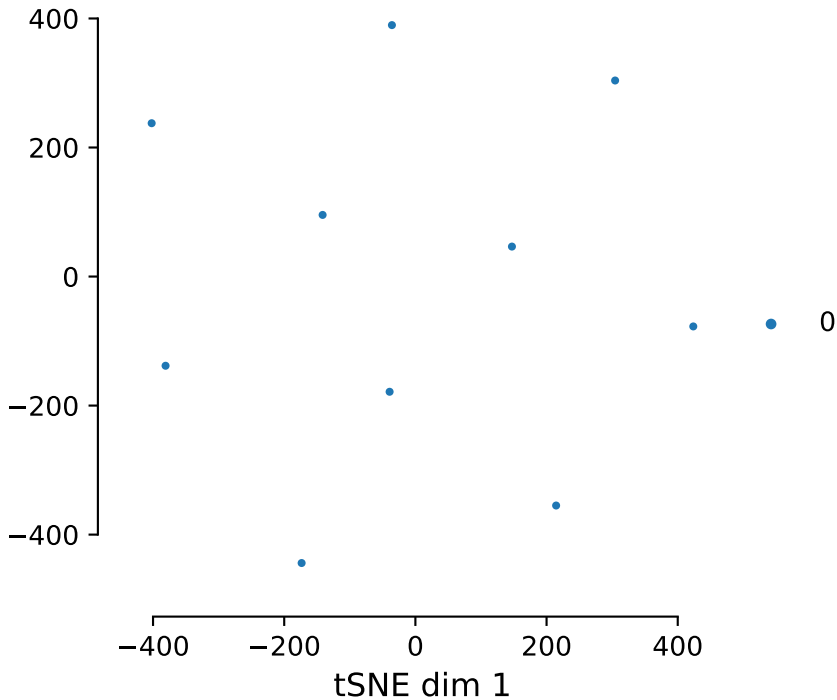

Supplement: Supplemental_Code_and_Data_2.zip [file tsne.pdf › co-embedding-scATAC-seq-queries/EMBEDDING_1_CODE/output_human_myoblast_SCALE/tsne.pdf]

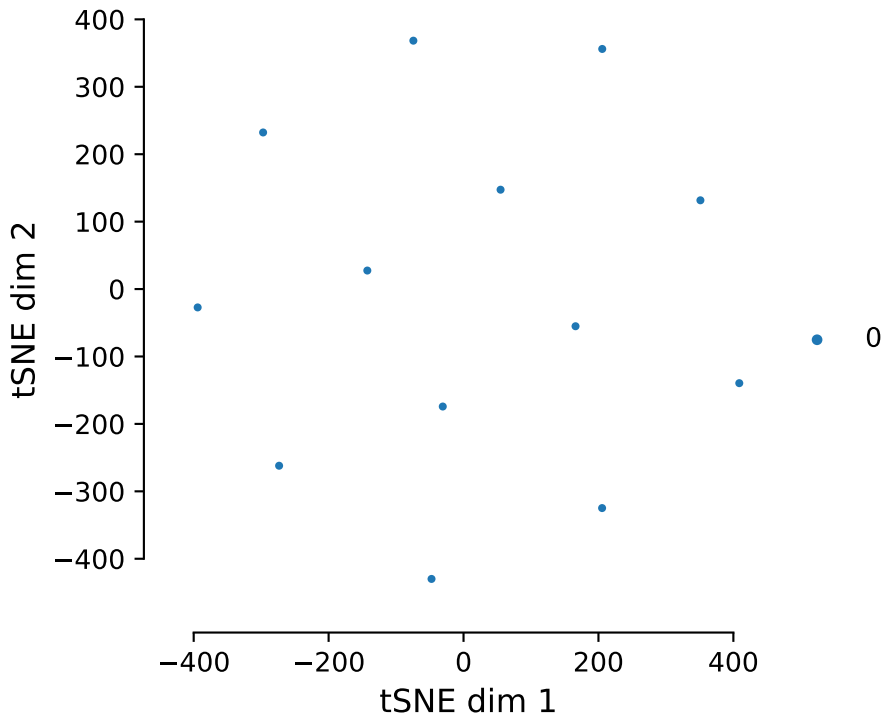

Supplement: Supplemental_Code_and_Data_2.zip [file tsne.pdf › co-embedding-scATAC-seq-queries/EMBEDDING_1_CODE/output_human_neuron/tsne.pdf]

tSNE dim 2



Supplement: Supplemental_Code_and_Data_2.zip [file tsne.pdf › co-embedding-scATAC-seq-queries/EMBEDDING_1_CODE/output_mouse_forebrain_SCALE/tsne.pdf]

tSNE dim 2

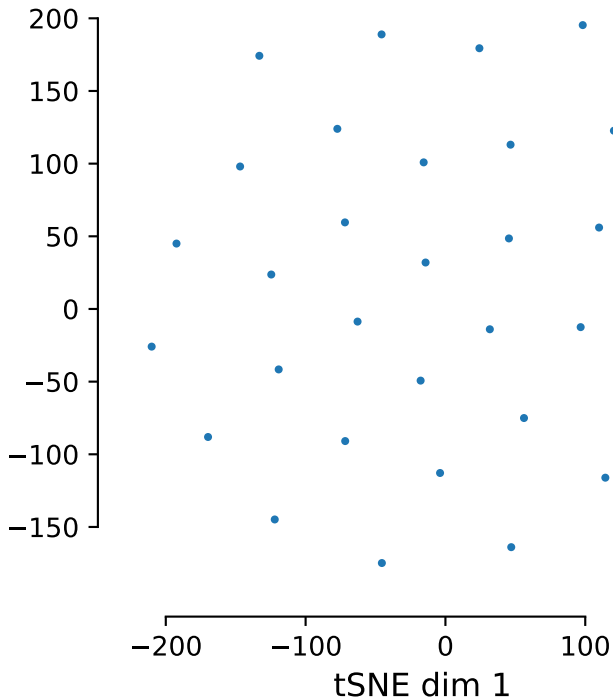

0

Supplement: Supplemental_Code_and_Data_2.zip [file tsne.pdf › co-embedding-scATAC-seq-queries/EMBEDDING_1_CODE/output_mouse_hsc/tsne.pdf]
